# Supplementary material for: Pan-cancer analysis of prognostic and immunological role of IL4I1 in human tumors: a bulk omics research and single cell sequencing validation
Source: Discov Oncol. 2024 May 1;15:139. doi: 10.1007/s12672-024-01000-5 (PMC11063023; doi:10.1007/s12672-024-01000-5)
Supplement: Supplementary file 2 — Additional file 2: (XLSX 11 KB) [file 12672_2024_1000_MOESM2_ESM.xlsx]

## Sheet: Sheet1
Clinical characteristics of 68 patients with gliomas.
Age (years)	Sex	Grade	Survival status (alive/0,dead/1)	Survival time (months)
<=50y	Male	Ⅰ-Ⅱ	0	17.4
>50y	Female	Ⅰ-Ⅱ	0	2.3
>50y	Male	Ⅲ-Ⅳ	0	19.9
<=50y	Male	Ⅰ-Ⅱ	0	18.8
<=50y	Male	Ⅲ-Ⅳ	1	13.7
<=50y	Female	Ⅲ-Ⅳ	0	16.6
>50y	Male	Ⅲ-Ⅳ	0	17.4
<=50y	Female	Ⅰ-Ⅱ	0	16.4
<=50y	Male	Ⅲ-Ⅳ	1	5.9
<=50y	Male	Ⅲ-Ⅳ	1	10.4
<=50y	Male	Ⅰ-Ⅱ	0	16.9
<=50y	Female	Ⅰ-Ⅱ	0	17.2
>50y	Male	Ⅰ-Ⅱ	0	16.5
>50y	Male	Ⅲ-Ⅳ	0	9.5
<=50y	Female	Ⅰ-Ⅱ	0	16
>50y	Male	Ⅲ-Ⅳ	1	11.8
>50y	Male	Ⅲ-Ⅳ	1	1.5
>50y	Male	Ⅰ-Ⅱ	0	9.7
<=50y	Female	Ⅰ-Ⅱ	0	18.8
<=50y	Female	Ⅰ-Ⅱ	0	18.6
<=50y	Male	Ⅰ-Ⅱ	0	16.2
<=50y	Female	Ⅲ-Ⅳ	1	11.3
<=50y	Female	Ⅲ-Ⅳ	0	10
>50y	Male	Ⅲ-Ⅳ	0	10.9
<=50y	Female	Ⅰ-Ⅱ	0	15.4
<=50y	Male	Ⅲ-Ⅳ	1	11.2
<=50y	Male	Ⅲ-Ⅳ	0	16.6
>50y	Female	Ⅰ-Ⅱ	0	2.3
<=50y	Female	Ⅲ-Ⅳ	0	17.2
<=50y	Female	Ⅲ-Ⅳ	0	2.7
>50y	Male	Ⅲ-Ⅳ	0	16
>50y	Male	Ⅲ-Ⅳ	1	4
<=50y	Female	Ⅰ-Ⅱ	0	19
>50y	Female	Ⅲ-Ⅳ	0	15.5
<=50y	Female	Ⅰ-Ⅱ	0	16.6
>50y	Female	Ⅲ-Ⅳ	0	10.7
<=50y	Male	Ⅲ-Ⅳ	0	2.4
<=50y	Female	Ⅲ-Ⅳ	0	19.4
<=50y	Male	Ⅰ-Ⅱ	0	17.6
<=50y	Male	Ⅲ-Ⅳ	0	17.1
<=50y	Female	Ⅰ-Ⅱ	0	16.9
>50y	Male	Ⅲ-Ⅳ	1	4.2
<=50y	Male	Ⅲ-Ⅳ	1	7.2
<=50y	Male	Ⅰ-Ⅱ	0	18.5
>50y	Female	Ⅰ-Ⅱ	0	16.4
>50y	Female	Ⅲ-Ⅳ	0	16
>50y	Male	Ⅰ-Ⅱ	1	16.7
>50y	Male	Ⅰ-Ⅱ	0	10.7
>50y	Female	Ⅲ-Ⅳ	1	11
<=50y	Female	Ⅰ-Ⅱ	0	17.3
>50y	Male	Ⅲ-Ⅳ	1	2.9
<=50y	Female	Ⅰ-Ⅱ	0	15.8
<=50y	Male	Ⅲ-Ⅳ	1	15.3
<=50y	Female	Ⅲ-Ⅳ	1	9.8
<=50y	Female	Ⅲ-Ⅳ	0	18.6
<=50y	Female	Ⅰ-Ⅱ	0	16.5
>50y	Female	Ⅲ-Ⅳ	1	0.37
<=50y	Female	Ⅲ-Ⅳ	0	2
<=50y	Male	Ⅲ-Ⅳ	1	8.4
>50y	Female	Ⅲ-Ⅳ	1	1.6
>50y	Male	Ⅲ-Ⅳ	1	4.1
>50y	Male	Ⅲ-Ⅳ	1	18.6
>50y	Male	Ⅲ-Ⅳ	1	7.6
<=50y	Male	Ⅰ-Ⅱ	0	17.3
>50y	Female	Ⅲ-Ⅳ	1	1.1
>50y	Female	Ⅲ-Ⅳ	0	18.1
>50y	Female	Ⅲ-Ⅳ	1	2.8
>50y	Male	Ⅲ-Ⅳ	1	9.9
